# Supplementary material for: Effect of Sleep Intervention Programs on the Quality of Sleep of Patients in Cardiac Rehabilitation Center
Source: Research Square preprint supplement (doi:10.21203/rs.3.rs-147742/v1), 2021-02-17
Supplement: Supplementary file 2 [file 2874d5a983da476e13c91e99.docx]

Title Page

**Effect of Sleep Intervention Programs on the Quality of Sleep of Patients in Cardiac Rehabilitation Center**

Fatemeh Ghaneh 1, Mahdieh Ghanbari Firozabadi 2, Farzan Madadizadeh3, Khadijeh Nasiriani*4

1 MSc student in Critical Care Nursing, Department of Nursing, Shahid Sadoughi University of Medical Sciences Campus, Yazd, Iran.

2 Director of Health Promoting Afshar Clinic ,Yazd Cardiovascular Research Center, Shahid Sadoughi University of Medical Sciences, Yazd, Iran.

3 PhD in statistic, Research Center of Prevention and Epidemiology of Non-Communicable Disease, Departments of biostatistics and Epidemiology, School of public health, Shahid Sadoughi University of Medical Sciences, Yazd, Iran.

4* PhD in Nursing, Associate Professor , Department of Nursing, , Research Centre for Nursing and Midwifery Care , Mother and Newbern Health  Research Centre, Shahid Sadoughi University of Medical Sciences, Yazd, Iran.

Corresponding Author:

Khadijeh Nasiriani

Address: Nursing And Midwifery College, Boali St , Safaeyeh , Yazd, Iran.

Phone numbers0098 9133593437

Fax numbers: 0098 3538280203

E-mail address nasiriani@gmail.com
